# Supplementary material for: Computational Insights into the Structural Dynamics of MDA5 Variants Associated with Aicardi–Goutières Syndrome and Singleton–Merten Syndrome
Source: MDPI journal article supplement (doi:10.3390/biom11081251), 2021-08-21
Supplement: s1 [file s1]

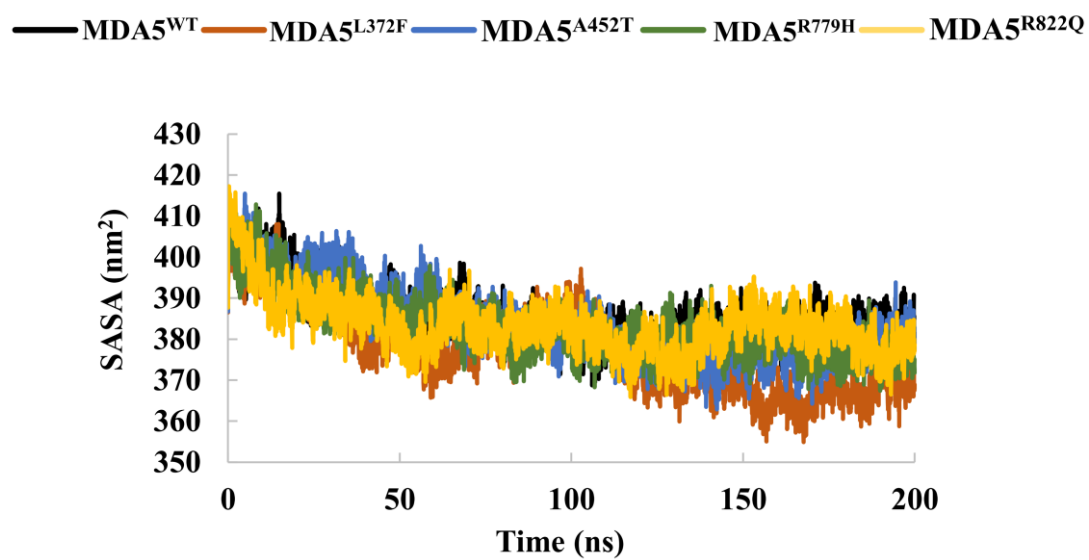

Figure S1: Solvent accessible surface area

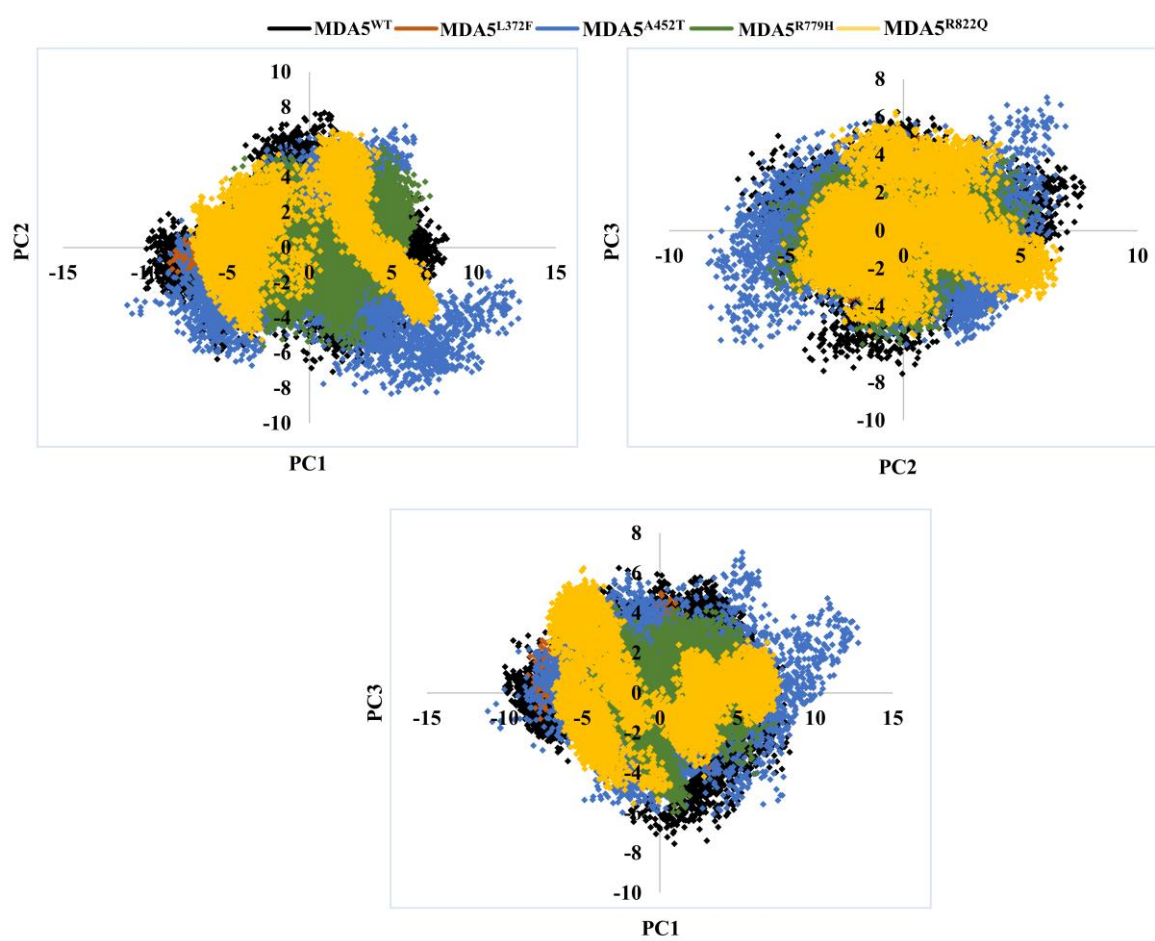

Figure S2: Projection of principal components on to the phase space.
